# Supplementary material for: Geospatial Cellular Distribution of Cancer-Associated Fibroblasts Significantly Impacts Clinical Outcomes in Metastatic Clear Cell Renal Cell Carcinoma
Source: MDPI journal article supplement (doi:10.3390/cancers13153743), 2021-07-26
Supplement: s1 [file s1]

Supplementary Materials

# Geospatial Cellular Distribution of Cancer-Associated Fibroblasts Significantly Impacts Clinical Outcomes in Metastatic Clear Cell Renal Cell Carcinoma

Nicholas H Chakiryan, Gregory J Kimmel, Youngchul Kim, Joseph O. Johnson, Noel Clark, Ali Hajiran, Andrew Chang, Ahmet M Aydin, Logan Zemp, Esther Katende, Jad Chahoud, Meghan C Ferrall-Fairbanks, Philippe E Spiess, Natasha Francis, Michelle Fournier, Jasreman Dhillon, Jong Y Park, Liang Wang, James J. Mulé, Philipp M Altrock and Brandon J Manley

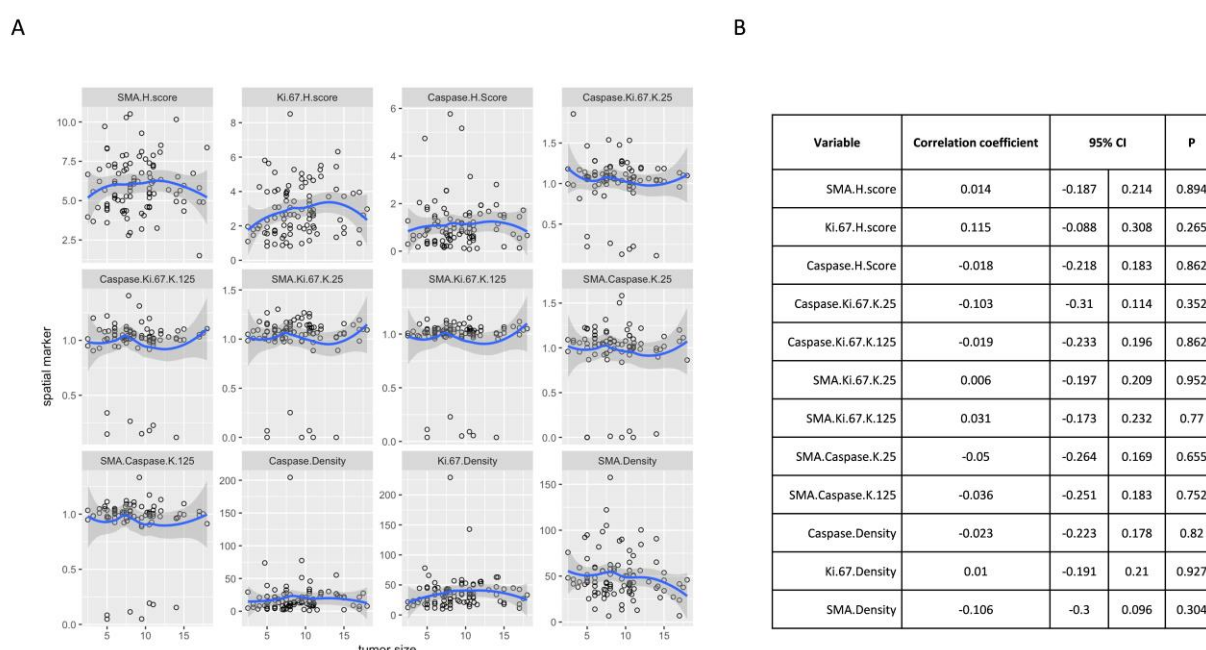

**Figure S1.** A. Scatter plots and best-fit lines correlating tumor size with the immunohistochemistry-derived metrics used in the analysis. B. Correlation coefficients and their associated 95% confidence intervals and *p* values correlating tumor size with each immunohistochemistry-derived metric.
